# Supplementary material for: Wine’s Phenolic Compounds and Health: A Pythagorean View
Source: PubMed Central journal article supplement (PMC7570485; doi:10.3390/molecules25184105), 2020-09-08
Supplement: molecules-25-04105-s001.pdf [file molecules-25-04105-s001.pdf]

Table S1. Human long-term studies with dealcoholized red wine.

| Subjects            | Study Design                    | Subjects' Characteristics                                                                                              | Controls of Non-Healthy Subjects                    | Intervention Period       | Run-in Period                   | Washout Between Interventions | Diet and Lifestyle      | Intervention                                                                                                                          | Plasma Lipid Metabolism Variables                                                                                      | Plasma Glucose Metabolism Variables | Haemostatic System Variables | Plasma Inflammatory and Other Variables                                                                                                                                                                      | Blood Pressure and Heart Rate Variables                                                                                                                                            | Gut Microbiota and Fecal Variables                                                                                                                                                                                                                                                                                                                                                                                                                                                                                                                                                           | Urinary Variables          | Ref  |
|---------------------|---------------------------------|------------------------------------------------------------------------------------------------------------------------|-----------------------------------------------------|---------------------------|---------------------------------|-------------------------------|-------------------------|---------------------------------------------------------------------------------------------------------------------------------------|------------------------------------------------------------------------------------------------------------------------|-------------------------------------|------------------------------|--------------------------------------------------------------------------------------------------------------------------------------------------------------------------------------------------------------|------------------------------------------------------------------------------------------------------------------------------------------------------------------------------------|----------------------------------------------------------------------------------------------------------------------------------------------------------------------------------------------------------------------------------------------------------------------------------------------------------------------------------------------------------------------------------------------------------------------------------------------------------------------------------------------------------------------------------------------------------------------------------------------|----------------------------|------|
| 24: 19 M 5 W 40-70y | Randomized crossover            | T2D, nonsmokers, regular drinkers, participants taking antihypertensive or lipid-lowering medication were not excluded | 22 M, 38-62y, healthy, nonsmokers, regular drinkers | 4 weeks each intervention | 4 weeks of usual alcohol intake | No                            | No other alcohol        | 1. RW (women 230 mL/day, alcohol ~24 g/day, men 300 mL/day ~31 g/day)<br>2. DRW (equivalent volumes)<br>3. Water (equivalent volumes) | -                                                                                                                      | -                                   | -                            | SPMs:<br>18-HEPE, RvE1-2, 18R-RvE3, 17-HDHA, RvD1, 17R-RvD1, RvD2, PD1, 14-HDHA, MaR-1<br>(Plasma SPMs were measured in 23 participants)<br>F2-isoprostanes                                                  | -                                                                                                                                                                                  | -                                                                                                                                                                                                                                                                                                                                                                                                                                                                                                                                                                                            | -                          | [84] |
| RESULTS             |                                 |                                                                                                                        |                                                     |                           |                                 |                               |                         |                                                                                                                                       |                                                                                                                        |                                     |                              | At BL:<br>T2D group vs. healthy control group:<br>↑ hs-CRP<br>↑ 18-HEPE<br>↑ 17-HDHA<br>↑ RvD1<br>↑ 17R-RvD1<br>Interventions:<br>NS                                                                         |                                                                                                                                                                                    |                                                                                                                                                                                                                                                                                                                                                                                                                                                                                                                                                                                              |                            |      |
| 22 M 20-65y         | Open-label randomized crossover | Healthy, regular drinkers, nonsmokers, no medication                                                                   | -                                                   | 4 weeks each intervention | 2 weeks no alcohol              | No                            | Usual, no other alcohol | 1. RW 375 mL/day, alcohol 41 g/day, polyphenols 2378 mg/L<br>2. DRW 375 mL/day, polyphenols 2284 mg/L<br>3. Water 375 mL/day          | TG, TC, LDL, HDL                                                                                                       | -                                   | -                            | CYP450 eicosanoids:<br>20-HETE, total EETs, total DHETs<br>F2-isoprostanes<br>hs-CRP<br>SPMs:<br>18R/S-HEPE, RvE1-2-3, 18R-RvE3, 17S-HDHA, RvD1, RvD2, 17R-RvD1, 10S,17S-DHDHA, 14R/SHDHA, MaR-1, PD1<br>GGT | SBP (24 h, awake, asleep)<br>DBP (24 h, awake, asleep)<br>HR (24 h, awake, asleep)                                                                                                 | -                                                                                                                                                                                                                                                                                                                                                                                                                                                                                                                                                                                            | 20-HETE<br>F2-isoprostanes | [85] |
| RESULTS             |                                 |                                                                                                                        |                                                     |                           |                                 |                               |                         | RW vs. DRW, water:<br>↑ HDL                                                                                                           |                                                                                                                        |                                     |                              | RW vs. DRW:<br>↑ 20-HETE<br>RW vs. DRW, water:<br>↑ F2-isoprostanes<br>↑ 18-HEPE<br>↑ RvD1<br>↑ 17R-RvD1<br>↑ GGT                                                                                            | RW vs. DRW, water:<br>↑ 24 h BP<br>↑ Awake SBP<br>↑ Awake DBP<br>RW vs. DRW:<br>↑ 24 h HR<br>↑ Awake HR<br>↑ Asleep HR<br>DRW vs. water:<br>↓ 24 h HR<br>↓ Awake HR<br>↓ Asleep HR | RW vs. DRW, water:<br>↑ 20-HETE<br>Urinary 20-HETE was positively related to plasma 18-HEPE only after RW                                                                                                                                                                                                                                                                                                                                                                                                                                                                                    |                            |      |
| 24: 19 M 5 W 46-66y | Randomized crossover            | T2D, nonsmokers, regular drinkers, participants taking antihypertensive or lipid-lowering medication were not excluded | -                                                   | 4 weeks each intervention | 4 weeks of usual alcohol intake | No                            | Usual, no other alcohol | 1. RW (230 mL/day, alcohol 24 g/day W, 300 mL/day 31 g/day M)<br>2. DRW (equivalent volumes)<br>3. Water (equivalent volumes)         | TG, TC, HDL, LDL, TC/HDL                                                                                               | Glucose<br>Insulin<br>HOMA-IR       | Fibrinogen                   | hs-CRP<br>Homocysteine<br>Uric acid                                                                                                                                                                          | SBP (24 h, awake, asleep)<br>DBP (24 h, awake, asleep)<br>HR (24 h, awake, asleep)                                                                                                 | -                                                                                                                                                                                                                                                                                                                                                                                                                                                                                                                                                                                            | Na, Na/Cr                  | [86] |
| RESULTS             |                                 |                                                                                                                        |                                                     |                           |                                 |                               |                         | RW vs. water:<br>↑ TC<br>↑ TC/HDL                                                                                                     | NS                                                                                                                     | NS                                  | NS                           | NS                                                                                                                                                                                                           | RW vs. water:<br>↑ Awake SBP<br>↑ Awake DBP<br>RW vs. DRW:<br>↓ Asleep DBP<br>RW vs. DRW, water:<br>↑ 24 h HR<br>↑ Awake HR<br>↑ Asleep HR                                         | NS<br>(A lower 24-h urinary sodium excretion during the RW period was no longer significant after correction for creatinine excretion)                                                                                                                                                                                                                                                                                                                                                                                                                                                       |                            |      |
| 10 M 45-50y         | Randomized crossover            | Metabolic syndrome                                                                                                     | 10 healthy men                                      | 30 days each intervention | 2 weeks no RW                   | 15 days                       | Usual, no other alcohol | 1. RW 272 mL/day<br>2. DRW 272 mL/day                                                                                                 | TG, TC, HDL, LDL                                                                                                       | Glucose                             | -                            | CRP<br>LPS<br>Uric acid<br>GGT, GOT, GPT                                                                                                                                                                     | SBP, DBP                                                                                                                                                                           | <b>Proteobacteria</b><br><i>Escherichia coli</i><br><i>Enterobacter cloacae</i><br><b>Fusobacteria</b><br><b>Actinobacteria</b><br><i>Bifidobacterium</i><br><i>Eggerthella lenta</i><br><b>Bacteroidetes</b><br><i>Bacteroides</i><br><i>Bacteroides uniformis</i><br><i>Parabacteroides distasonis</i><br><i>Prevotella</i><br><b>Firmicutes</b><br><i>Blautia coccoides-Eubacterium rectale</i> group<br><i>Enterococcus</i><br><i>Clostridium</i> cluster IV<br><i>Clostridium histolyticum</i> group<br><i>Lactobacillus</i><br><i>Faecalibacterium prausnitzii</i><br><i>Roseburia</i> | -                          | [87] |
| RESULTS             |                                 |                                                                                                                        |                                                     |                           |                                 |                               |                         | At BL, metabolic syndrome group vs. healthy control group:<br>↑ TC<br>↑ TG<br>↓ HDL<br>RW, DRW vs. BL in metabolic                    | At BL, metabolic syndrome group vs. healthy control group:<br>↑ Glucose<br>RW, DRW vs. BL in metabolic syndrome group: |                                     |                              | At BL, metabolic syndrome group vs. healthy control group:<br>↑ GGT<br>↑ CRP<br>↑ LPS<br>RW, DRW vs. BL in metabolic syndrome group:<br>↓ CRP<br>↓ LPS                                                       | At BL, metabolic syndrome group vs. healthy control group:<br>↑ SBP<br>↑ DBP                                                                                                       | RW, DRW vs. BL in metabolic syndrome group:<br><b>Proteobacteria</b><br>↓ <i>Escherichia coli</i><br>↓ <i>Enterobacter cloacae</i><br>↑ <b>Fusobacteria</b><br>↑ <b>Actinobacteria</b><br>↑ <i>Bifidobacterium</i><br>↑ <i>Eggerthella lenta</i>                                                                                                                                                                                                                                                                                                                                             |                            |      |

|                |                                 |                                                      |   |                           |                                 |    |                         |                                                                                                                                                                                                                                                                                                             |                                                                                                                                                                                                   |                    |                                         |   |  |  |  |                                                                                                                                       |                                                                                                                                                          |                                                                                    |                                                                                                                                                                                                                                                                                                                                                                                                                                                                                                                                                                                                                                                                                                                                                                                                                                                                                                                                                                                                                                                                                                                                                                                                                                                                                                                                                                                                                                                                                                                                                                                                                                                                                                                                                                                                                                                                                                                                                                                                           |      |
|----------------|---------------------------------|------------------------------------------------------|---|---------------------------|---------------------------------|----|-------------------------|-------------------------------------------------------------------------------------------------------------------------------------------------------------------------------------------------------------------------------------------------------------------------------------------------------------|---------------------------------------------------------------------------------------------------------------------------------------------------------------------------------------------------|--------------------|-----------------------------------------|---|--|--|--|---------------------------------------------------------------------------------------------------------------------------------------|----------------------------------------------------------------------------------------------------------------------------------------------------------|------------------------------------------------------------------------------------|-----------------------------------------------------------------------------------------------------------------------------------------------------------------------------------------------------------------------------------------------------------------------------------------------------------------------------------------------------------------------------------------------------------------------------------------------------------------------------------------------------------------------------------------------------------------------------------------------------------------------------------------------------------------------------------------------------------------------------------------------------------------------------------------------------------------------------------------------------------------------------------------------------------------------------------------------------------------------------------------------------------------------------------------------------------------------------------------------------------------------------------------------------------------------------------------------------------------------------------------------------------------------------------------------------------------------------------------------------------------------------------------------------------------------------------------------------------------------------------------------------------------------------------------------------------------------------------------------------------------------------------------------------------------------------------------------------------------------------------------------------------------------------------------------------------------------------------------------------------------------------------------------------------------------------------------------------------------------------------------------------------|------|
|                |                                 |                                                      |   |                           |                                 |    |                         |                                                                                                                                                                                                                                                                                                             | <p>syndrome group:<br/>↓ TG<br/>↓ TC<br/>↑ HDL</p> <p>RW, DRW vs. BL in healthy control group:<br/>↓ TC<br/>After interventions, metabolic syndrome group vs. healthy control group:<br/>↑ TG</p> | ↓ Glucose          |                                         |   |  |  |  |                                                                                                                                       | <p>RW, DRW vs. BL in healthy control group:<br/>↓ GPT</p> <p>After both interventions, metabolic syndrome group vs. healthy control group:<br/>↑ GGT</p> | <p>RW, DRW vs. BL in metabolic syndrome group:<br/>↓ SBP<br/>↓ DBP</p>             | <p>↑ <b>Bacteroidetes</b><br/>↓ <i>Bacteroides</i><br/>↑ <i>Prevotella</i><br/>↓ <b>Firmicutes</b><br/>↑ <i>Blautia coccooides-Eubacterium rectale</i> group<br/>↓ <i>Clostridium</i> cluster IV<br/>↓ <i>Clostridium histolyticum</i> group<br/>↑ <i>Lactobacillus</i><br/>↑ <i>Faecalibacterium prausnitzii</i><br/>↑ <i>Roseburia</i></p> <p>RW, DRW vs. BL in healthy control group:<br/><b>Actinobacteria</b><br/>↑ <i>Bifidobacterium</i><br/>↑ <i>Eggerthella lenta</i><br/>↑ <b>Bacteroidetes</b><br/>↓ <i>Bacteroides uniformis</i><br/><b>Firmicutes</b><br/>↑ <i>Faecalibacterium prausnitzii</i><br/>↑ <i>Roseburia</i></p> <p>The significantly <u>lower</u> number of <i>Bifidobacterium</i>, <i>Eggerthella lenta</i>, <i>Prevotella</i>, <i>Blautia coccooides-Eubacterium rectale</i> group, <i>Lactobacillus</i>, <i>Faecalibacterium prausnitzii</i> and <i>Roseburia</i> and a significantly <u>higher</u> number of <i>Proteobacteria</i>, <i>Firmicutes</i>, <i>Escherichia coli</i>, <i>Enterobacter cloacae</i>, <i>Bacteroides</i>, <i>Parabacteroides distasonis</i>, <i>Clostridium</i> spp. and <i>Clostridium histolyticum</i> observed at BL in the metabolic syndrome group vs. the healthy group, disappeared after the two red wine intervention periods</p> <p>In the metabolic syndrome group:<br/>The increase in <i>Actinobacteria</i> and <i>Lactobacillus</i> and the decrease in <i>Clostridium histolyticum</i> and <i>Escherichia coli</i> predicted the triglyceride reduction.<br/>The increase in <i>Bifidobacterium</i> predicted cholesterol reduction.<br/>The increase in <i>Faecalibacterium prausnitzii</i> predicted glucose reduction.<br/>The decrease in <i>Clostridium</i> predicted the decrease in CRP.<br/>The increase in <i>Bifidobacterium</i> and the decrease in <i>Enterobacter cloacae</i> predicted the reduction in plasma LPS.</p> <p>In the healthy group:<br/>The decrease in <i>Clostridium</i> predicted the decrease in SBP</p> |      |
| 24 W<br>24-49y | Randomized crossover            | Healthy, nonsmokers, regular drinkers, premenopausal | - | 4 weeks each intervention | 4 weeks of usual alcohol intake | No | Usual, no other alcohol | <p>1. High volume RW (200 mL/day for lower-level alcohol consumers, 300 mL/day for higher-level alcohol consumers)</p> <p>2. Low volume RW (100 mL/day for 4 days/week for lower-level alcohol consumers, 100 mL/day for higher-level alcohol consumers)</p> <p>3. DRW (same volumes as high volume RW)</p> | TC, TC, HDL, LDL                                                                                                                                                                                  | Glucose<br>Insulin | Fibrinogen                              | - |  |  |  |                                                                                                                                       | <p>SBP (24 h, awake, asleep)<br/>DBP (24 h, awake, asleep)<br/>HR (24 h, awake, asleep)</p>                                                              | 24 h Na                                                                            | [88]                                                                                                                                                                                                                                                                                                                                                                                                                                                                                                                                                                                                                                                                                                                                                                                                                                                                                                                                                                                                                                                                                                                                                                                                                                                                                                                                                                                                                                                                                                                                                                                                                                                                                                                                                                                                                                                                                                                                                                                                      |      |
| RESULTS        |                                 |                                                      |   |                           |                                 |    |                         |                                                                                                                                                                                                                                                                                                             | High volume RW vs. DRW:<br>↑ HDL                                                                                                                                                                  | NS                 | High volume RW vs. DRW:<br>↓ Fibrinogen |   |  |  |  | High volume RW vs. low volume RW, DRW:<br>↑ 24 h SBP<br>↑ Awake SBP<br>↑ 24 h DBP<br>High volume RW vs. low volume RW:<br>↑ Awake DBP |                                                                                                                                                          | NS                                                                                 |                                                                                                                                                                                                                                                                                                                                                                                                                                                                                                                                                                                                                                                                                                                                                                                                                                                                                                                                                                                                                                                                                                                                                                                                                                                                                                                                                                                                                                                                                                                                                                                                                                                                                                                                                                                                                                                                                                                                                                                                           |      |
| 9 M<br>45-50y  | Open-label randomized crossover | Healthy                                              | - | 20 days each intervention | No alcohol intake               | No | Usual, no other alcohol | <p>1. RW 272 mL/day, alcohol 30 g/day</p> <p>2. DRW 272 mL/day</p> <p>3. Gin 100 mL/day, alcohol 30 g/day</p>                                                                                                                                                                                               |                                                                                                                                                                                                   |                    |                                         |   |  |  |  |                                                                                                                                       |                                                                                                                                                          | <p><i>Bifidobacterium</i><br/><i>Enterococcus</i><br/><i>Eggerthella lenta</i></p> | <p>Hydroxybenzoic acids, 2,4-dihydroxybenzoic acid, 2,6-dihydroxybenzoic acid, 2,5-dihydroxybenzoic acid, 3,5-dihydroxybenzoic acid, Protocatechuic acid, Vanillic acid, Syringic acid, 4-hydroxybenzoic acid, 3-hydroxybenzoic acid, 4-hydroxyhippuric acid, 3-hydroxyhippuric acid, Gallic acid, 4-O-methyl gallic acid, Methyl gallic acid,</p>                                                                                                                                                                                                                                                                                                                                                                                                                                                                                                                                                                                                                                                                                                                                                                                                                                                                                                                                                                                                                                                                                                                                                                                                                                                                                                                                                                                                                                                                                                                                                                                                                                                        | [89] |





|                |                                       |                                                            |   |                              |                                   |         |                                        |                                                                                                                             |                                                                                                        |         |   |                                                                                        | ↓ GGT                                                                |                                                                                                                                                                                                                                                                                                                                                                                                                                                                                                                                                                                                                                                                                                                                                                                                                                                                                                                                                                                                                                                                                                                                                     |      |
|----------------|---------------------------------------|------------------------------------------------------------|---|------------------------------|-----------------------------------|---------|----------------------------------------|-----------------------------------------------------------------------------------------------------------------------------|--------------------------------------------------------------------------------------------------------|---------|---|----------------------------------------------------------------------------------------|----------------------------------------------------------------------|-----------------------------------------------------------------------------------------------------------------------------------------------------------------------------------------------------------------------------------------------------------------------------------------------------------------------------------------------------------------------------------------------------------------------------------------------------------------------------------------------------------------------------------------------------------------------------------------------------------------------------------------------------------------------------------------------------------------------------------------------------------------------------------------------------------------------------------------------------------------------------------------------------------------------------------------------------------------------------------------------------------------------------------------------------------------------------------------------------------------------------------------------------|------|
| 10 M<br>45-50y | Randomized<br>crossover               | Healthy                                                    | - | 20 days each<br>intervention | 15 days<br>no<br>alcohol or<br>RW | No      | Usual, no<br>other<br>alcohol          | 1. DRW 272 mL/day,<br>polyphenols<br>733mEqGA/day<br>2. RW 272 mL/day,<br>polyphenols 798<br>mEqGA/day<br>3. Gin 100 mL/day | TC, TG, HDL,<br>LDL                                                                                    | Glucose | - | CRP<br>Uric acid<br>GOT, GPT, GGT                                                      | DBP<br>SBP                                                           | <b>Proteobacteria</b><br><b>Fusobacteria</b><br><b>Actinobacteria</b><br><i>Bifidobacterium</i><br><i>Eggerthella lenta</i><br><b>Bacteroidetes</b><br><i>Bacteroides</i><br><i>Bacteroides uniformis</i><br><i>Prevotella</i><br><b>Firmicutes</b><br><i>Blautia coccooides-Eubacterium rectale</i><br><i>group</i><br><i>Enterococcus</i><br><i>Clostridium</i><br><i>Clostridium histolyticum group</i><br><i>Lactobacillus</i>                                                                                                                                                                                                                                                                                                                                                                                                                                                                                                                                                                                                                                                                                                                  | [83] |
| RESULTS        |                                       |                                                            |   |                              |                                   |         |                                        |                                                                                                                             | RW, DRW, gin<br>vs. BL:<br>↓ TG<br>RW, DRW vs.<br>BL, gin:<br>↓ HDL<br>RW vs. BL,<br>DRW, gin:<br>↓ TC | NS      |   | RW, DRW vs. BL, gin:<br>↓ CRP<br>↓ GGT<br>↓ GOT<br>RW vs. BL, DRW, gin:<br>↓ Uric acid | RW vs. BL, DRW,<br>gin:<br>↓ DBP<br>RW, DRW vs. BL,<br>gin:<br>↓ SBP | ↑ <b>Proteobacteria</b> (RW vs. BL, gin)<br>↑ <b>Fusobacteria</b> (RW vs. BL, gin;<br>DRW vs. BL)<br><b>Actinobacteria</b> (NS)<br>↑ <i>Bifidobacterium</i> (RW, DRW vs. BL,<br>gin)<br>↑ <i>Eggerthella lenta</i> (RW, DRW vs.<br>BL, gin)<br>↑ <b>Bacteroidetes</b> (RW vs. BL, DRW,<br>gin)<br>↑ <i>Bacteroides</i> (RW vs. BL, gin)<br>↑ <i>Bacteroides uniformis</i> (RW vs. BL,<br>gin)<br>↑ <i>Prevotella</i> (RW vs. BL, gin;<br>↓ <i>Prevotella gin</i> vs. BL, RW, DRW)<br>↑ <b>Firmicutes</b> (RW vs. BL, DRW,<br>gin)<br>↑ <i>Blautia coccooides-Eubacterium</i><br><i>rectale group</i> (RW vs. BL, gin; DRW<br>vs. BL)<br>↑ <i>Enterococcus</i> (RW, DRW vs. BL,<br>gin)<br>↑ <i>Clostridium</i> (gin vs. BL, RW,<br>DRW)<br>↑ <i>Clostridium histolyticum group</i><br>(gin vs. BL, RW, DRW)<br><i>Lactobacillus</i> (NS)<br>Significant univariate correlations:<br><i>Bacteroides</i> with DBP, SBP, TG, TC,<br>HDL<br><i>Enterococcus</i> with SBP<br><i>Bifidobacterium</i> with TC, CRP<br><i>Lactobacillus</i> with HDL, CRP<br>Multivariate regression analysis:<br>↑ <i>Bacteroides</i> predicted ↓ DBP<br>↓ SBP ↓ TG ↓ HDL. |      |
| 8<br>25-40y    | Randomized<br>crossover               | Healthy                                                    | - | 1 week each<br>intervention  | 2 days                            | 1 month | Low<br>phenolic<br>diet, no<br>alcohol | 1. Low phenolic diet<br>(LPD)<br>2. DRW + LPD                                                                               | TC, TG, LDL,<br>HDL                                                                                    | -       | - | -                                                                                      | -                                                                    | <i>Inflammatory marker:</i><br>CRP<br><i>Antioxidant enzymes:</i><br>Superoxide dismutase,<br>Catalase,<br>Glutathione peroxidase,<br>Glutathione reductase<br><i>Endogenous antioxidants:</i><br>Uric acid, Albumin, Bilirubin<br><i>Antioxidant capacity:</i><br>FRAP, ORAC, GSH/GSSG<br><i>Hepatic profile:</i><br>GOT, GPT, GGT<br>LPD + DRW vs. BL, LPD:<br>↑ Glutathione reductase activity<br>↑ Catalase activity<br>↑ Superoxide dismutase activity<br>LPD vs. BL:<br>↓ Glutathione reductase activity<br>↓ Catalase activity<br>↓ Superoxide dismutase activity<br>DRW + LPD vs. BL:<br>↑ FRAP                                                                                                                                                                                                                                                                                                                                                                                                                                                                                                                                             | [95] |
| RESULTS        |                                       |                                                            |   |                              |                                   |         |                                        |                                                                                                                             | NS                                                                                                     |         |   |                                                                                        |                                                                      |                                                                                                                                                                                                                                                                                                                                                                                                                                                                                                                                                                                                                                                                                                                                                                                                                                                                                                                                                                                                                                                                                                                                                     |      |
| 67 M<br>55-75y | Open-label<br>randomized<br>crossover | High cardiovascular<br>risk, moderate<br>alcohol consumers | - | 4 weeks each<br>intervention | 2 weeks<br>no<br>alcohol          | No      | Usual, no<br>other<br>alcohol          | 1. RW 272 mL/day,<br>alcohol 30 g/day<br>2. DRW 272 mL/day<br>3. Gin 100 mL/day,<br>alcohol 30 g/day                        | -                                                                                                      | -       | - | -                                                                                      | -                                                                    | <i>Inflammatory markers:</i><br>CD40a, CD40L, CRP, E-selectin, ICAM-1, IL-<br>1α, IL-10, IL-16, IL-18, IL-6, MCP-1, MCP-2,<br>MCP-3, MDC, MIP-1α, MIP1F1, TNF-α,<br>VCAM-1<br><i>Adhesion molecules on T-lymphocytes and</i><br><i>monocytes:</i><br>VLA-4, LFA-1, Mac-1, SLe <sup>x</sup> , CD40, CD36,<br>CCR2<br><i>Inflammatory markers:</i><br>DRW vs. RW, Gin:<br>↓ E-selectin<br>RW, DRW vs. Gin, BL:<br>↓ ICAM-1<br>↓ IL-6                                                                                                                                                                                                                                                                                                                                                                                                                                                                                                                                                                                                                                                                                                                  | [82] |
| RESULTS        |                                       |                                                            |   |                              |                                   |         |                                        |                                                                                                                             |                                                                                                        |         |   |                                                                                        |                                                                      |                                                                                                                                                                                                                                                                                                                                                                                                                                                                                                                                                                                                                                                                                                                                                                                                                                                                                                                                                                                                                                                                                                                                                     |      |



|                     |                                   |                                                             |                                      |                           |                                                  |        |                                                                                                                                                                |                                                                                                                                                                      |                  |   |   |                                                                                                                                                                                                                                                                  |                                                                                                                                                                                                                          |                                                                                                                                                                                                                                                          |           |       |
|---------------------|-----------------------------------|-------------------------------------------------------------|--------------------------------------|---------------------------|--------------------------------------------------|--------|----------------------------------------------------------------------------------------------------------------------------------------------------------------|----------------------------------------------------------------------------------------------------------------------------------------------------------------------|------------------|---|---|------------------------------------------------------------------------------------------------------------------------------------------------------------------------------------------------------------------------------------------------------------------|--------------------------------------------------------------------------------------------------------------------------------------------------------------------------------------------------------------------------|----------------------------------------------------------------------------------------------------------------------------------------------------------------------------------------------------------------------------------------------------------|-----------|-------|
| 78 (-4)<br>18-50y   | Randomized                        | Healthy, nonsmokers                                         | 25 healthy subjects were given water | 6 weeks                   | 1 week, dietary restrictions as during the study | -      | Coffee, black or green tea <150 mL/day each, fruit juice <200 mL/day each, no grape juice, multivitamin juices or alcohol                                      | 1. RW n = 27 200 mL/day<br>2. DRW n = 26 175 mL/day<br>3. No intervention n = 25                                                                                     | -                | - | - | TPP, TEAC, Vit. C, α-Tocopherol, Uric acid, Albumin, Bilirubin, Endogenous DNA strand breaks in peripheral leukocytes (TM <sub>0</sub> ), Exogenous DNA strand breaks in peripheral leukocytes (TM <sub>300</sub> )                                              | -                                                                                                                                                                                                                        | -                                                                                                                                                                                                                                                        | [99]      |       |
| RESULTS             |                                   |                                                             |                                      |                           |                                                  |        |                                                                                                                                                                |                                                                                                                                                                      |                  |   |   | RW vs. BL:<br>↑ TPP<br>↓ TM <sub>0</sub><br>No intervention vs. BL:<br>↑ Uric acid<br>DRW vs. BL:<br>↓ Bilirubin                                                                                                                                                 |                                                                                                                                                                                                                          |                                                                                                                                                                                                                                                          |           |       |
| 28 M (-4)<br>39-65y | Open-label randomized crossover   | Healthy, nonsmokers, regular drinkers                       | -                                    | 4 weeks each intervention | 2 weeks no alcohol                               | No     | Usual diet, no alcohol, no antioxidant supplementation or over-the-counter medication, tea intake ≤2 cups/day                                                  | 1. RW 375 mL/day 39g/day<br>2. DRW 375 mL/day<br>3. Beer 3 × 375 mL/day 41 g/day<br>4. Control (no alcohol or grape products intake)                                 | -                | - | - | GGT                                                                                                                                                                                                                                                              | BP (awake, asleep, 24 h)<br>HR (awake, asleep, 24 h)<br>FMD and GTNMD of brachial artery                                                                                                                                 | -                                                                                                                                                                                                                                                        | ET-1      | [100] |
| RESULTS             |                                   |                                                             |                                      |                           |                                                  |        |                                                                                                                                                                |                                                                                                                                                                      |                  |   |   | RW, beer vs. DRW, control:<br>↑ GGT                                                                                                                                                                                                                              | RW vs. control, DRW:<br>↑ 24 h SBP<br>↑ Awake SBP<br>↑ 24 h HR<br>↑ Asleep HR<br>Beer vs. control:<br>↑ 24 h SBP<br>↑ Awake SBP<br>Beer vs. control, DRW:<br>↑ 24 h HR<br>↑ Asleep HR<br>RW, beer vs. DRW:<br>↑ Awake HR | There was no specific effect of RW, DRW or beer on ET-1.<br><br>However, post hoc comparison of the averaged results from the 2 alcohol periods (beer and RW) and nonalcohol periods (control and DRW) found that alcohol increased urine ET-1 excretion |           |       |
| 24 M<br>30.6 ± 1.4y | Single-blind randomized crossover | Healthy, nonsmokers, moderate alcohol consumers             | -                                    | 2 weeks each intervention | 2 months no vitamin supplements or medication    | 1 week | Usual diet, no alcohol or food products rich in anthocyanin or polyphenols, no vitamin supplements or medication                                               | 1. RW 500 mL/day<br>2. DRW 500 mL/day<br>3. Red grape juice (RGJ) 500 mL/day<br>4. EtOH 500 mL/day                                                                   | -                | - | - | Lymphocyte-specific cytokines:<br>IL-2<br>IL-4<br>Monocyte-specific cytokines:<br>TGFβ<br>TNFα<br>TNFα-mRNA<br>Phagocytic activity of granulocytes and monocytes,<br>Apoptotic activity of T-lymphocytes,<br>Lymphocyte proliferation,<br>NK cell lytic activity | -                                                                                                                                                                                                                        | -                                                                                                                                                                                                                                                        | [101]     |       |
| RESULTS             |                                   |                                                             |                                      |                           |                                                  |        |                                                                                                                                                                |                                                                                                                                                                      |                  |   |   | NS                                                                                                                                                                                                                                                               | NS                                                                                                                                                                                                                       |                                                                                                                                                                                                                                                          |           |       |
| 18 M<br>25-71y      | Randomized crossover              | Healthy, smokers, light to moderate drinkers, no medication | -                                    | 2 weeks each intervention | 1 week no alcohol                                | 1 week | Usual, no other alcohol, no antioxidant supplements or over-the-counter medication                                                                             | 1. RW 375 mL/day, 1200 mg/L polyphenols<br>2. WW 375 mL/day, 345 mg/L polyphenols<br>3. DRW 500 mL/day, 905 mg/L polyphenols                                         | TC, TG, HDL, LDL | - | - | F2-isoprostanes<br>Arachidonic acid<br>Uric acid<br>Vit. C<br>β-Carotene<br>α-Tocopherol<br>γ-Tocopherol<br>GGT                                                                                                                                                  | -                                                                                                                                                                                                                        | F2-isoprostanes                                                                                                                                                                                                                                          | [102]     |       |
| RESULTS             |                                   |                                                             |                                      |                           |                                                  |        |                                                                                                                                                                |                                                                                                                                                                      |                  |   |   | DRW vs. RW, WW:<br>↓ F2-isoprostanes<br>RW, WW vs. DRW:<br>↑ Uric acid<br>↓ β-Carotene<br>RW, WW vs. BL:<br>↑ GGT<br>DRW vs. BL:<br>↓ GGT                                                                                                                        | DRW vs. RW:<br>↓ F2-isoprostanes                                                                                                                                                                                         |                                                                                                                                                                                                                                                          |           |       |
| 6 M<br>22-29y       | Randomized crossover              | Healthy, moderate alcohol consumers                         | -                                    | 18 days each intervention | 3 days                                           | No     | The subjects were housed in a closed, apartment-like metabolic unit for the duration of the experiment, except for occasional supervised walks, and were given | 1. W 1l/day<br>2. DW 1l/day<br>3. EtOH 1l/day (9,3% alcohol)<br>4. Deionized water 1l/day<br>The daily beverage intake was given in divided doses over a 12 h period | -                | - | - | Zn balance<br>P balance<br>Ca balance<br>Mg balance<br>Na balance<br>K balance<br>N balance<br>Fluid balance<br>BUN<br>Total protein<br>Creatinine<br>Uric acid                                                                                                  | Zn, P, Ca, Mg, Na, K, N                                                                                                                                                                                                  | Total N, creatinine, urea N, uric acid, Urine osmolality<br>Urine output volume                                                                                                                                                                          | [103-106] |       |

for these subjects, and the summary of their urine and fecal data for this period represents 12 instead of 18 days.

a controlled diet. Daily exercise routine: two half-hour sessions of walking on a treadmill, one 15 min session on a bicycle ergometer and a 15 min exercise session of the individual's choice, decided upon before the study and maintained throughout.

RESULTS

DW, W vs. EtOH, deionized water:  
 ↑ Zn balance  
 EtOH vs. W, DW:  
 ↓ Ca balance  
 ↓ Mg balance  
 Deionized water vs. DW:  
 ↓ Ca balance  
 DW vs. W, EtOH, deionized water:  
 ↑ P balance  
 EtOH vs. W, DW, deionized water:  
 ↓ K balance  
 W vs. EtOH:  
 ↑ Fluid balance

W, DW vs. EtOH:  
 ↓ Zn  
 DW vs. deionized water:  
 ↓ Zn  
 DW vs. EtOH, deionized water:  
 ↓ Ca  
 W vs. EtOH:  
 ↓ Ca  
 ↑ N ( $p = 0.05$ )  
 W, DW vs. EtOH, deionized water:  
 ↓ P  
 ↓ Mg

W, EtOH vs. DW, deionized water:  
 ↑ Zn  
 ↑ P  
 W vs. EtOH:  
 ↑ P  
 W, EtOH vs. deionized water:  
 ↑ Mg  
 DW vs. EtOH, deionized water:  
 ↓ Na  
 EtOH vs. W, DW, deionized water:  
 ↑ K  
 DW vs. W, EtOH, deionized water:  
 ↓ Urine osmolality  
 Mean of alcohol periods vs. mean of non-alcohol periods:  
 ↑ Total N  
 ↑ Uric acid  
 ↑ Urea N  
 Deionized water vs. DW:  
 ↑ Urea N  
 There was a significant difference between alcohol (W and EtOH) and nonalcohol (DW and deionized water) periods for phosphorus (P).

M = men; W = women; y = years; T2D = type 2 diabetes; BMI = body mass index; RW = red wine; DRW = dealcoholized red wine; SMPs = specialised pro-resolving mediators of inflammation; 18-HEPE = 18-hydroxyeicosapentaenoic acid; RvE1-2, 18R-RvE3 = E-series resolvins; 17-HDHA = 17-hydroxydocosahexaenoic acid; RvD1, 17R-RvD1, RvD2 = D-series resolvins; PD1 = protectin D1; 14-HDHA = 14-hydroxydocosahexaenoic acid; MaR-1 = maresin-1; NS = non significant; TG = triglycerides; TC = total cholesterol; HDL = high density lipoproteins; LDL = low density lipoproteins; 20-HETE = 20-Hydroxyeicosatetraenoic acid; EETs = epoxyeicosatrienoic acids; DHETs = dihydroxyeicosatrienoic acids; hs-CRP = high sensitivity C-reactive protein; 18R/S-HEPE = 18R/S-hydroxy-eicosapentaenoic acid; 18R-RvE3 = 18R-resolvin E3; 17S-HDHA = 17S-hydroxydocosahexaenoic acid; 10S,17S-DHDHA = 10S,17S-dihydroxy-docosahexaenoic acid; 14R/SHDHA = 14-hydroxydocosahexaenoic acid; PD1 = protectin-1; BP = blood pressure; HR = heart rate; DBP = diastolic blood pressure; SBP = systolic blood pressure; HOMA-IR = homeostatic model assessment for insulin resistance; Na = sodium; Cr = creatinine; CRP = C-reactive protein; LPS = lipopolysaccharide; BL = baseline; LBP = lipopolysaccharide binding protein; ApoA-I = apolipoprotein A1; ApoA-II = apolipoprotein A2; Lp(a) = Lipoprotein(a); ApoB = apolipoprotein B; ApoC-I = apolipoprotein C1; ApoC-III = apolipoprotein C3; GH = growth hormone; EGA/day = Eq Gallic Acid/day; NO = nitric oxide; TEAC = trolox equivalent antioxidant capacity; NF-κB = nuclear factor kappa-light-chain-enhancer of activated B cells; 8-iso PGF<sub>2α</sub> = 8-iso prostaglandin F<sub>2α</sub>; FRAP = ferric reducing ability; ORAC = oxygen radical absorbance capacity; GSH/GSSG = reduced glutathione/oxidized glutathione; CD40a = cluster of differentiation 40 antigen; CD40L = cluster of differentiation 40 ligand; ICAM-1 = intercellular adhesion molecule 1; IL = interleukin; MCP = monocyte chemotactic protein; MDC = macrophage-derived chemokine; MIP-1α = macrophage inflammatory protein 1α; MIP1 = myeloid progenitor inhibitory factor 1; TNF-α = tumor necrosis factor α; VCAM-1 = vascular cell adhesion molecule 1; VLA-4 = very late activation antigen 4; LFA-1 = lymphocyte function-associated antigen 1 (CD11a); Mac-1 = macrophage-1 receptor; SLe<sup>x</sup> = Sialyl-Lewis X, CD15s; CD36 = cluster of differentiation 36; CCR2 = C-C chemokine receptor type 2; TL = T-lymphocytes; MW = muscadine wine; MJ = muscadine juice; SAT = saturated fatty acid; MUFA = monounsaturated fatty acid; PUFA = polyunsaturated fatty acid; K = potassium; Cl = chloride; CO<sub>2</sub> = carbon dioxide; ALP = alkaline phosphatase; Ca = calcium; P = phosphorus; Mg = magnesium; Zn = zinc; N = nitrogen; ISI = insulin sensitivity index; TPP = total phenolic content in plasma; TM<sub>0</sub> = Tail Moment in untreated cells (endogenous DNA strand breaks); TM<sub>300</sub> = Tail Moment in cells treated with 300 μM H<sub>2</sub>O<sub>2</sub> for 20 min (exogenous DNA strand breaks); FMD = flow-mediated dilatation (%); GTNMD = glyceryl trinitrate-mediated dilatation (%); ET-1 = endothelin 1; EtOH = ethanol; TGFβ = transforming growth factor β; TNFα = tumor necrosis factor α; W = wine; DW = dealcoholized wine; BUN = blood urea nitrogen; GGT = gamma-glutamyl transferase; GOT = glutamic oxaloacetic transaminase; GPT = glutamic pyruvic transaminase; CVD = cardiovascular disease.



Table S2. Human acute or short-term studies with dealcoholized red wine.

| Subjects            | Study design         | Subjects' Characteristics                       | Run-In Before Each Intervention                                            | Washout between Interventions                        | Meal Characteristics  | Data Collection After Intervention                                                                   | Intervention                                                                                                     | Plasma Lipid Metabolism Variables                                                                                                                                                                                                                                                                                                                                      | Plasma glucose metabolism variables           | Haemostatic System Variables | Plasma Inflammatory and Other Variables                 | Blood Pressure and Heart Rate Variables                                                                                                 | Urinary Variables                                                                                                                                                                                                                                                                                                                                                                                                                                                                                                                                                                                                                                                                                                                                                                    | Ref   |
|---------------------|----------------------|-------------------------------------------------|----------------------------------------------------------------------------|------------------------------------------------------|-----------------------|------------------------------------------------------------------------------------------------------|------------------------------------------------------------------------------------------------------------------|------------------------------------------------------------------------------------------------------------------------------------------------------------------------------------------------------------------------------------------------------------------------------------------------------------------------------------------------------------------------|-----------------------------------------------|------------------------------|---------------------------------------------------------|-----------------------------------------------------------------------------------------------------------------------------------------|--------------------------------------------------------------------------------------------------------------------------------------------------------------------------------------------------------------------------------------------------------------------------------------------------------------------------------------------------------------------------------------------------------------------------------------------------------------------------------------------------------------------------------------------------------------------------------------------------------------------------------------------------------------------------------------------------------------------------------------------------------------------------------------|-------|
| 28 M<br>26.6y       | Randomized crossover | Healthy                                         | Overnight fast, 72 h no alcohol, poor phenolic diet                        | 3 days                                               | -                     | Blood: 0, 1, 2, 4, 6, 22 h<br>SBP, DBP, HR: 0, 2, 4, 6 h<br>Urine: 2-0, 0-2, 2-4, 4-6, 6-12, 12-22 h | 1. W 147 mL<br>2. Vodka diluted in lemon-flavored water 147 mL<br>3. DW 147 mL<br>4. Lemon-flavored water 147 ml | OxLDL<br>Lipid peroxides<br>TG, HDL                                                                                                                                                                                                                                                                                                                                    | Glucose                                       | -                            | CRP                                                     | SBP<br>DBP<br>HR                                                                                                                        | Total OHTyr (DOPET)<br>OHTyr-3-O-sulfate<br>OHTyr glucuronides<br>Free OHTyr<br>Total HVAL<br><b>Total tyrosol</b><br>Tyrosol-4-O-glucuronide<br>Free tyrosol<br>DOPAC<br>HVA<br>4HPAA                                                                                                                                                                                                                                                                                                                                                                                                                                                                                                                                                                                               | [107] |
| RESULTS             |                      |                                                 |                                                                            |                                                      |                       |                                                                                                      |                                                                                                                  | W vs. BL, water:<br>↓ OxLDL (22 h)<br>↓ Lipid peroxides (22 h)<br>OxLDL and lipid peroxides were inversely related with 0-6 h urinary OHTyr excretion.<br>Vodka vs. DW, water:<br>↑ TG (2 h)<br>W, vodka vs. DW, water:<br>↑ TG (4, 6 h)<br>W, DW vs. water:<br>↑ HDL (2 h)<br>Changes in HDL cholesterol were directly related with the urinary 0-6 h OHTyr excretion | W, vodka vs. DW, water:<br>↓ Glucose (1, 2 h) |                              | NS                                                      | W, vodka vs. water:<br>↑ HR (2, 4 h)                                                                                                    | W, DW, vodka vs. water:<br>↑ <b>Total OHTyr (0-6 h)</b><br>↑ OHTyr-3-O-sulfate (0-6 h)<br>↑ OHTyr glucuronides (0-6 h)<br>↑ <b>Total tyrosol (0-6 h)</b><br>↑ Tyrosol-4-O-glucuronide (0-6 h)<br>↓ DOPAC/DOPET (0-6 h)<br>W, DW vs. vodka:<br>↑ <b>Total OHTyr (0-6 h)</b><br>↑ OHTyr-3-O-sulfate (0-6 h)<br>W vs. DW:<br>↑ <b>Total OHTyr (0-6 h)</b><br>↑ OHTyr-3-O-sulfate (0-6 h)<br>Vodka vs. water:<br>↑ Total HVAL (0-6 h)<br>W vs. DW, vodka, water:<br>↑ Free tyrosol (0-6 h)<br>W vs. DW, vodka:<br>↑ <b>Total tyrosol (0-6 h)</b><br>↑ Tyrosol-4-O-glucuronide (0-6 h)<br>DW vs. vodka, water:<br>↑ DOPAC (0-6 h)<br>W, DW vs. water:<br>↑ HVA (0-6 h)<br>W, DW vs. vodka, water:<br>↑ 4HPAA (0-6 h)<br>DW vs. W, vodka:<br>↑ HVA (0-6 h)<br>DW vs. W:<br>↑ 4HPAA (0-6 h) |       |
| 25 M (-1)<br>20-65y | Randomized crossover | Healthy, regular drinkers, nonsmokers           | Overnight fast, 48 h no alcohol, 2 weeks no dietary supplements            | 2 weeks, usual drinking, dietary and exercise habits | Light meal            | Blood: 0, 2, 4, 24 h<br>BP, HR: every 20 min while awake, every 30 min while asleep, for 24 h        | 1. RW 375 mL, 41 g alcohol<br>2. DRW 375 mL<br>3. Water 375 ml                                                   | -                                                                                                                                                                                                                                                                                                                                                                      | -                                             | -                            | 20-HETE<br>EETs<br>DHETs<br>ET-1<br>F2-isoprostanes     | SBP<br>DBP<br>HR                                                                                                                        | -                                                                                                                                                                                                                                                                                                                                                                                                                                                                                                                                                                                                                                                                                                                                                                                    | [108] |
| RESULTS             |                      |                                                 |                                                                            |                                                      |                       |                                                                                                      |                                                                                                                  |                                                                                                                                                                                                                                                                                                                                                                        |                                               |                              | W vs. RW, water:<br>↑ 20-HETE (4 h period, 24 h period) | RW vs. DRW, water:<br>↓ SBP (0-4 h and 24 h period)<br>↑ SBP (20-24 h)<br>↓ DBP (0-4 h and 24 h period)<br>↑ HR (0-4 h and 24 h period) |                                                                                                                                                                                                                                                                                                                                                                                                                                                                                                                                                                                                                                                                                                                                                                                      |       |
| 5 M<br>30-54y       | Randomized crossover | Healthy, moderate alcohol consumers, nonsmokers | 2 days, the day before all participants consumed the same diet, no alcohol | 2 days, usual dietary and lifestyle habits           | 50g fat overload (FO) | Blood: 0, 3 h                                                                                        | 1. Fat overload (FO) + RW 272 mL<br>2. FO + DRW 272 mL<br>3. FO + Gin 100 mL<br>4. FO + No intervention          | Chylomicron-LPS, TG, ΔTG, TC, HDL, LDL, ApoA-I, ApoB                                                                                                                                                                                                                                                                                                                   | Glucose<br>HOMA-IR                            | -                            | LPS<br>LBP<br>CRP<br>GGT<br>GPT                         | -                                                                                                                                       | -                                                                                                                                                                                                                                                                                                                                                                                                                                                                                                                                                                                                                                                                                                                                                                                    | [80]  |
| RESULTS             |                      |                                                 |                                                                            |                                                      |                       |                                                                                                      |                                                                                                                  | NS                                                                                                                                                                                                                                                                                                                                                                     | NS                                            |                              | NS                                                      |                                                                                                                                         | Postprandial chylomicron LPS correlated positively with the change in TG between BL and postprandial                                                                                                                                                                                                                                                                                                                                                                                                                                                                                                                                                                                                                                                                                 |       |
| 19 M<br>35-68y      | Randomized crossover | Healthy, nonsmokers, regular alcohol consumers  | 3 h no eating or drinking                                                  | 4 weeks daily intake of the other intervention       | Standardized          | Blood: 0, 1 h                                                                                        | 1. RW 450mL, 41.4 g alcohol<br>2. DRW 450 ml                                                                     | -                                                                                                                                                                                                                                                                                                                                                                      | -                                             | -                            | TEAC<br>NF-kB                                           | -                                                                                                                                       | -                                                                                                                                                                                                                                                                                                                                                                                                                                                                                                                                                                                                                                                                                                                                                                                    | [80]  |
| RESULTS             |                      |                                                 |                                                                            |                                                      |                       |                                                                                                      |                                                                                                                  |                                                                                                                                                                                                                                                                                                                                                                        |                                               |                              | RW vs. DRW:<br>↑ TEAC (1 h)                             |                                                                                                                                         |                                                                                                                                                                                                                                                                                                                                                                                                                                                                                                                                                                                                                                                                                                                                                                                      | [94]  |
|                     |                      |                                                 |                                                                            |                                                      |                       |                                                                                                      |                                                                                                                  |                                                                                                                                                                                                                                                                                                                                                                        |                                               |                              | DRW vs. RW, BL:<br>↑ NF-kB (1 h)                        |                                                                                                                                         |                                                                                                                                                                                                                                                                                                                                                                                                                                                                                                                                                                                                                                                                                                                                                                                      |       |

|                   |                                         |                        |                                                                                                                                                          |           |                                                                                                                                                                                                                                                 |                                                                                       |                                                                                                                                                                                         |             |   |        |                                                                                                                                                                                                                                                                                                                                                                                                                               |                                                                   |                                                                    |                                                           |  |
|-------------------|-----------------------------------------|------------------------|----------------------------------------------------------------------------------------------------------------------------------------------------------|-----------|-------------------------------------------------------------------------------------------------------------------------------------------------------------------------------------------------------------------------------------------------|---------------------------------------------------------------------------------------|-----------------------------------------------------------------------------------------------------------------------------------------------------------------------------------------|-------------|---|--------|-------------------------------------------------------------------------------------------------------------------------------------------------------------------------------------------------------------------------------------------------------------------------------------------------------------------------------------------------------------------------------------------------------------------------------|-------------------------------------------------------------------|--------------------------------------------------------------------|-----------------------------------------------------------|--|
| 22 M<br>23 ± 1.8y | Double-blind<br>randomized<br>crossover | Healthy,<br>nonsmokers | Overnight fast, 12 h<br>no caffeine or<br>tobacco, 36 h no<br>alcohol                                                                                    | ≥ 2 weeks | -                                                                                                                                                                                                                                               | Blood: 0, 2 h<br>Coronary measurements: 0,<br>30min                                   | 1. RW 8.1 ± 0.9 dl, 1.0 g/kg<br>alcohol<br>2. DRW 8.1 ± 0.9 dl                                                                                                                          | -           | - | -      | ET-1                                                                                                                                                                                                                                                                                                                                                                                                                          | Coronary flow velocity and<br>epicardial diameter,<br>HR          | -                                                                  | [109]                                                     |  |
| RESULTS           |                                         |                        |                                                                                                                                                          |           |                                                                                                                                                                                                                                                 |                                                                                       |                                                                                                                                                                                         |             |   |        | RW, DRW vs. BL:<br>↓ ET-1 (2 h)                                                                                                                                                                                                                                                                                                                                                                                               | RW vs. BL:<br>↑ HR                                                |                                                                    |                                                           |  |
| 22 M<br>23 ± 1.8y | Randomized<br>crossover                 | Healthy,<br>nonsmokers | Overnight fast                                                                                                                                           | ≥ 1 week  | -                                                                                                                                                                                                                                               | Blood: 0, 1–2 h                                                                       | 1. RW 8.1 ± 0.9 dl, 1.0 g/kg<br>alcohol<br>2. DRW 8.1 ± 0.9 dl<br>3. Cognac 2.4 ± 0.4dl, 1.0<br>g/kg alcohol                                                                            | Adiponectin | - | tPAI-1 | sE-Selectin, sVCAM-1,<br>sICAM-1, MMP-9, MPO,<br>hsCRP                                                                                                                                                                                                                                                                                                                                                                        | -                                                                 | -                                                                  | [110]                                                     |  |
| RESULTS           |                                         |                        |                                                                                                                                                          |           |                                                                                                                                                                                                                                                 |                                                                                       |                                                                                                                                                                                         |             |   |        | NS                                                                                                                                                                                                                                                                                                                                                                                                                            | RW vs. BL,<br>DRW, cognac:<br>↑ tPAI-1 (1–2<br>h)                 | Cognac vs. BL: ↓ MMP-9 (1–<br>2 h)                                 |                                                           |  |
| 27                | Randomized                              | Healthy,<br>nonsmokers | Overnight fast, 24 h<br>no alcohol or<br>polyphenol-rich<br>food                                                                                         | -         | A polyphenol-<br>poor breakfast<br>was offered 60<br>min after bolus<br>ingestion.                                                                                                                                                              | Blood: 0, 1.5, 6 h                                                                    | 9 subjects:<br>RW 200 mL<br>9 subjects:<br>DRW 175 mL<br>9 subjects:<br>Water 200 ml                                                                                                    | -           | - | -      | Apoptotic T cells, phagocytic<br>activity of granulocytes and<br>monocytes, respiratory burst<br>of granulocytes and<br>monocytes                                                                                                                                                                                                                                                                                             | -                                                                 | -                                                                  | [97]                                                      |  |
| RESULTS           |                                         |                        |                                                                                                                                                          |           |                                                                                                                                                                                                                                                 |                                                                                       |                                                                                                                                                                                         |             |   |        | DRW, water vs. BL, RW:<br>↓ T cell apoptosis (6 h)                                                                                                                                                                                                                                                                                                                                                                            | Water vs. BL:<br>↓ T cell apoptosis (90 min)                      | RW, DRW vs. BL:<br>↑ Monocytes' respiratory<br>burst (90 min, 6 h) | DRW vs. water:<br>↑ Monocytes' respiratory<br>burst (6 h) |  |
| 22 M<br>23 ± 1.8y | Randomized<br>crossover                 | Healthy,<br>nonsmokers | Overnight fast, 12 h<br>no caffeine or<br>tobacco, 36 h no<br>alcohol                                                                                    | ≥ 1 week  | Adenosine<br>infusion                                                                                                                                                                                                                           | CFR: 0, 30 min after each dose<br>BP, HR: 0 h and during the<br>adenosine infusion    | 1. RW 8.1 ± 0.9 dl<br>administered in 2 doses of<br>4.0 ± 0.4 dl each<br>2. DRW 8.1 ± 0.9 dl<br>administered in 2 doses of<br>4.0 ± 0.4 dl each<br>3. Control, no intervention          | -           | - | -      | Plasma antioxidant capacity<br>(ImAnOx assay)                                                                                                                                                                                                                                                                                                                                                                                 | Coronary flow velocity reserve<br>(CFR),<br>Rate pressure product | -                                                                  | [111]                                                     |  |
| RESULTS           |                                         |                        |                                                                                                                                                          |           |                                                                                                                                                                                                                                                 |                                                                                       |                                                                                                                                                                                         |             |   |        | RW vs. BL:<br>↑ Plasma antioxidant<br>capacity                                                                                                                                                                                                                                                                                                                                                                                | RW vs. BL:<br>↑ CFR (1 dose RW)                                   |                                                                    |                                                           |  |
| 9 M<br>25–40y     | Randomized<br>crossover                 | Healthy,<br>nonsmokers | Overnight fast, 24 h<br>no alcohol, exercise,<br>fruits, vegetables,<br>dietary<br>supplements, tea,<br>caffeine- or<br>theobromine-<br>containing foods | 1 week    | The subjects<br>remained in the<br>supine position<br>and abstained<br>from any food<br>or additional<br>beverages<br>during the<br>three-hour<br>study.<br><br>4 subjects, who<br>were assigned<br>to RW, were<br>also treated<br>with uricase | Blood: 0, 0.5, 1, 1.5, 2, 3 h<br>Blood of subjects treated with<br>uricase:<br>0, 1 h | 1. RW 3 mL/kg body weight,<br>195–280 mL total<br>2. DRW 3 mL/kg<br>3. Polyphenols-stripped red<br>wine (PSRW) 3 mL/kg<br>4. Ethanol–water solution<br>(ET) 3 mL/kg<br>5. Water 3 mL/kg | -           | - | -      | Urate<br>Catechin<br>FRAP                                                                                                                                                                                                                                                                                                                                                                                                     | -                                                                 | -                                                                  | [112]                                                     |  |
| RESULTS           |                                         |                        |                                                                                                                                                          |           |                                                                                                                                                                                                                                                 |                                                                                       |                                                                                                                                                                                         |             |   |        | RW vs. DRW, PSRW, ET,<br>water:<br>↑ FRAP (1, 1.5, 2, 3 h)<br>Water, ET vs. RW, DRW,<br>PSRW:<br>↓ FRAP (0.5, 1, 1.5, 2 h)<br>ET vs. RW, DRW, PSRW,<br>water:<br>↓ FRAP (3 h)<br>RW, DRW vs. PSRW, ET,<br>water:<br>↑ Catechin (0.5, 1, 1.5, 2, 3 h)<br>RW, PSRW vs. DRW, ET,<br>water:<br>↑ Urate (0.5, 1, 1.5, 2, 3 h)<br>RW vs. PSRW:<br>↑ Urate (1, 1.5, 2 h)<br>DRW vs. RW, PSRW, ET,<br>water:<br>↓ Urate (1.5, 2, 3 h) |                                                                   |                                                                    |                                                           |  |

|                              |                                   |                                                     |                                                                                                                                    |                                                         |                                                                                                                                                                                                                              |                                                             |                                                                                                     |  |  |  |  |                                                                                                                                                                                                                                                                                                                                                   |                                                                                                                                                                                                                     |       |
|------------------------------|-----------------------------------|-----------------------------------------------------|------------------------------------------------------------------------------------------------------------------------------------|---------------------------------------------------------|------------------------------------------------------------------------------------------------------------------------------------------------------------------------------------------------------------------------------|-------------------------------------------------------------|-----------------------------------------------------------------------------------------------------|--|--|--|--|---------------------------------------------------------------------------------------------------------------------------------------------------------------------------------------------------------------------------------------------------------------------------------------------------------------------------------------------------|---------------------------------------------------------------------------------------------------------------------------------------------------------------------------------------------------------------------|-------|
|                              |                                   |                                                     |                                                                                                                                    |                                                         |                                                                                                                                                                                                                              |                                                             |                                                                                                     |  |  |  |  | From the experiments with uricase, it was found that urate accounted for approximately 60% of total plasma antioxidant capacity.                                                                                                                                                                                                                  |                                                                                                                                                                                                                     |       |
| 20:<br>12 M<br>8 W           | Double-blind crossover            | Healthy, smokers                                    | 12 h fast and abstinence from smoking                                                                                              | Usual diet and same meals the day before each study day | 1 slice of white bread (30 gr) and 30 gr of cottage-cheese (4% fat)                                                                                                                                                          | FMD: 0, 0.5, 1, 1.5 h                                       | 1. 1 cigarette (1Cig)<br>2. 1Cig + RW 250 mL<br>3. 1Cig + DRW 250 ml                                |  |  |  |  |                                                                                                                                                                                                                                                                                                                                                   | Artery Diameter, Flow at Rest, Flow in Hyperemia, HR, Flow mediated dilatation (FMD)                                                                                                                                | [113] |
| RESULTS                      |                                   |                                                     |                                                                                                                                    |                                                         |                                                                                                                                                                                                                              |                                                             |                                                                                                     |  |  |  |  |                                                                                                                                                                                                                                                                                                                                                   | 1Cig vs. BL:<br>↓ FMD (0.5, 1 h)<br>↑ HR (0.5 h)<br>1Cig + RW vs. BL:<br>↑ Artery diameter (0.5 h)<br>Overall FMD response after 1Cig + RW and 1Cig + DRW was significantly different from 1Cig + RW and 1Cig + DRW |       |
| 9 M<br>25-40y                | Randomized crossover              | Healthy, nonsmokers                                 | Overnight fast, 24 h no alcohol, exercise, fruits, vegetables, dietary supplements, tea, caffeine- or theobromine-containing foods | 1 week                                                  | The subjects remained in the supine position and abstained from any food or beverages during the 2-h study.                                                                                                                  | Blood: 0, 0.5, 1, 2 h<br>FMD: 0, 1 h<br>HR, BP: 0, 0.5, 1 h | 1. RW 3 mL/kg body weight<br>2. DRW 3 mL/kg<br>3. PSRW 3 mL/kg<br>4. ET 3 mL/kg<br>5. Water 3 mL/kg |  |  |  |  | Urate<br>Catechin                                                                                                                                                                                                                                                                                                                                 | Brachial artery diameter, FMD, Normalized FMD, HR, BP                                                                                                                                                               | [114] |
| RESULTS                      |                                   |                                                     |                                                                                                                                    |                                                         |                                                                                                                                                                                                                              |                                                             |                                                                                                     |  |  |  |  | RW, DRW vs. PSRW, ET, water:<br>↑ Catechin (0.5, 1, 2 h)<br>RW, PSRW vs. DRW, ET, water:<br>↑ Urate (0.5, 1, 2 h)<br>RW vs. PSRW:<br>↑ Urate (1 h)<br>DRW vs. RW, PSRW, ET, water:<br>↓ Urate (2 h)                                                                                                                                               | RW, PSRW, ET vs. BL:<br>↑ Brachial artery diameter<br>RW vs. BL:<br>↑ Normalized FMD                                                                                                                                |       |
| 27:<br>6 M<br>21 W<br>18-50y | Randomized                        | Healthy, nonsmokers                                 | Overnight fast, 24 h no alcohol or polyphenol-rich food                                                                            |                                                         | 1 h after the first blood sampling, participants were offered a low in polyphenols breakfast<br><br>Participants were allowed to have lunch between the 1.5 h and the 6 h blood sampling, no alcohol or polyphenol-rich food | Blood: 0, 1.5, 6 h                                          | n = 9<br>RW 200 mL<br>n = 9<br>DRW 175mL<br>n = 9<br>Water 200 ml                                   |  |  |  |  | TPP, TEAC, Vit.C, Uric acid, Albumin, Bilirubin, Endogenous DNA strand breaks in peripheral leukocytes (TM <sub>0</sub> ), Exogenous DNA strand breaks in peripheral leukocytes (TM <sub>300</sub> )                                                                                                                                              |                                                                                                                                                                                                                     | [99]  |
| RESULTS                      |                                   |                                                     |                                                                                                                                    |                                                         |                                                                                                                                                                                                                              |                                                             |                                                                                                     |  |  |  |  | RW, DRW, water vs. BL:<br>↑ TPP (6 h)<br>RW, DRW vs. BL, water:<br>↑ TPP (1.5 h)<br>RW vs. BL:<br>↓ Vit.C (6 h)<br>↑ Uric acid (1.5 h)<br>DRW vs. BL:<br>↑ Vit.C (6 h)<br>RW, DRW vs. BL:<br>↓ Bilirubin (6 h)<br>↑ TM <sub>0</sub><br>DRW vs. RW, BL, water:<br>↓ TM <sub>300</sub><br>Water vs. BL:<br>↑ Albumin (1.5 h)<br>↑ Bilirubin (1.5 h) |                                                                                                                                                                                                                     |       |
| 15 M<br>52.4 ± 9.7y          | Double-blind randomized crossover | Coronary artery disease, moderate alcohol consumers | 12 h overnight fast and absence from smoking, 24 h no vasoactive medication                                                        | 24 h                                                    |                                                                                                                                                                                                                              | BP, arterial stiffness measurements: 0, 0.5, 1, 1.5 h       | 1. RW 250 mL<br>2. DRW 250 ml                                                                       |  |  |  |  |                                                                                                                                                                                                                                                                                                                                                   | Augmentation index (AIx), Augmentation index normalized for 75 bpm HR (AI 75), Mean BP, Peripheral SBP, Peripheral DBP, Peripheral PP (pulse pressure), Central SBP,                                                | [115] |

|                                  |                                         |                                                          |                    |                                                                        |                                                                                                        |                                                                     |                                                                                                                            |                             |         |   |   |   |   |   |   |   |                                                                                                                                                                                                                                                                                                                                                                                                            |       |
|----------------------------------|-----------------------------------------|----------------------------------------------------------|--------------------|------------------------------------------------------------------------|--------------------------------------------------------------------------------------------------------|---------------------------------------------------------------------|----------------------------------------------------------------------------------------------------------------------------|-----------------------------|---------|---|---|---|---|---|---|---|------------------------------------------------------------------------------------------------------------------------------------------------------------------------------------------------------------------------------------------------------------------------------------------------------------------------------------------------------------------------------------------------------------|-------|
|                                  |                                         |                                                          |                    |                                                                        |                                                                                                        |                                                                     |                                                                                                                            |                             |         |   |   |   |   |   |   |   | Central DBP,<br>Central PP,<br>Arrival time of reflected waves at<br>the central aorta ( $\Delta t$ ),<br>HR                                                                                                                                                                                                                                                                                               |       |
|                                  |                                         |                                                          |                    |                                                                        |                                                                                                        |                                                                     |                                                                                                                            |                             |         |   |   |   |   |   |   |   | RW, DRW vs. BL:<br>↓ Central SBP<br>↓ AI 75 (0.5, 1 h)<br>↑ HR                                                                                                                                                                                                                                                                                                                                             |       |
|                                  |                                         |                                                          |                    |                                                                        |                                                                                                        |                                                                     |                                                                                                                            |                             |         |   |   |   |   |   |   |   | DRW vs. BL:<br>↓ Peripheral DBP<br>↓ Central DBP                                                                                                                                                                                                                                                                                                                                                           |       |
|                                  |                                         |                                                          |                    |                                                                        |                                                                                                        |                                                                     |                                                                                                                            |                             |         |   |   |   |   |   |   |   | RW vs. DRW:<br>↓ Maximal central SBP<br>↓ Maximal central PP<br>↓ Maximal peripheral PP<br>↓ Maximal AI 75                                                                                                                                                                                                                                                                                                 |       |
|                                  |                                         |                                                          |                    |                                                                        |                                                                                                        |                                                                     |                                                                                                                            |                             |         |   |   |   |   |   |   |   | RW vs. BL:<br>↓ Central PP<br>↓ AI 75 (1.5 h)                                                                                                                                                                                                                                                                                                                                                              |       |
| 8 W                              | Randomized<br>crossover                 | Postmenopausal,<br>dyslipidemic                          | -                  | 2 weeks                                                                | Mixed meal                                                                                             | Blood: 0, 1, 2, 3, 4, 5, 6 h                                        | 1. RW<br>2. DRW<br>3. Water                                                                                                | TC, TG, LDL, HDL,<br>ApoB48 | Insulin | - | - | - | - | - | - | - | [116]                                                                                                                                                                                                                                                                                                                                                                                                      |       |
|                                  |                                         |                                                          |                    |                                                                        |                                                                                                        |                                                                     |                                                                                                                            |                             |         |   |   |   |   |   |   |   | RESULTS                                                                                                                                                                                                                                                                                                                                                                                                    |       |
|                                  |                                         |                                                          |                    |                                                                        |                                                                                                        |                                                                     |                                                                                                                            |                             |         |   |   |   |   |   |   |   | DRW vs. water:<br>↓ ApoB48                                                                                                                                                                                                                                                                                                                                                                                 |       |
| 16:<br>8 M<br>8 W<br>28.9 ± 6.5y | Double-blind<br>Randomized<br>crossover | Healthy,<br>nonsmokers                                   | 1st day: 12 h fast | 24 h, usual diet                                                       | 2nd, 3rd day:<br>1 slice of white<br>bread (30 g) and<br>30 g of cottage<br>cheese (4% fat)            | FMD: 0, 0.25, 0.5, 1, 1.5 h                                         | 1st day: 1 cigarette (1Cig)<br>2nd and 3rd day:<br>1. 1 Cig + RW 250 mL<br>2. 1 Cig + DRW 250 ml                           | -                           | -       | - | - | - | - | - | - | - | Brachial artery: vessel size, flow at<br>rest, hyperemia, flow mediated<br>dilatation (FMD)                                                                                                                                                                                                                                                                                                                | [117] |
|                                  |                                         |                                                          |                    |                                                                        |                                                                                                        |                                                                     |                                                                                                                            |                             |         |   |   |   |   |   |   |   | RESULTS                                                                                                                                                                                                                                                                                                                                                                                                    |       |
|                                  |                                         |                                                          |                    |                                                                        |                                                                                                        |                                                                     |                                                                                                                            |                             |         |   |   |   |   |   |   |   | 1 Cig vs. BL:<br>↓ FMD (0.25, 0.5, 1 h)                                                                                                                                                                                                                                                                                                                                                                    |       |
|                                  |                                         |                                                          |                    |                                                                        |                                                                                                        |                                                                     |                                                                                                                            |                             |         |   |   |   |   |   |   |   | 1 Cig vs. 1 Cig + RW, 1 Cig + DRW:<br>↓ FMD                                                                                                                                                                                                                                                                                                                                                                |       |
|                                  |                                         |                                                          |                    |                                                                        |                                                                                                        |                                                                     |                                                                                                                            |                             |         |   |   |   |   |   |   |   | 1Cig + RW vs. BL:<br>↑ Vessel size (0.5, 1.5 h)                                                                                                                                                                                                                                                                                                                                                            |       |
| 6 M<br>31 ± 1.6y                 | Randomized<br>crossover                 | Healthy,<br>nonsmokers,<br>moderate alcohol<br>consumers | Overnight fast     | 1 week, usual diet,<br>no polyphenol- or<br>anthocyanin- rich<br>foods | 2 white rolls<br>(150 g),<br>subsequent<br>meals were<br>provided to all<br>subjects for 24 h          | Blood: 0, 1, 3, 24 h                                                | 1. RW 500 mL<br>2. DRW 500 mL<br>3. 12% ethanol dilution 500<br>mL<br>4. Red grape juice (RGJ)                             | -                           | -       | - | - | - | - | - | - | - | TNF $\alpha$ , IL-2, IL-4,<br>Phagocytic activity of<br>neutrophils,<br>Phagocytic activity of<br>monocytes,<br>Phagocytic intensity of<br>neutrophils,<br>Phagocytic intensity of<br>monocytes, Lymphocyte<br>proliferation,<br>NK cell activity                                                                                                                                                          | [118] |
|                                  |                                         |                                                          |                    |                                                                        |                                                                                                        |                                                                     |                                                                                                                            |                             |         |   |   |   |   |   |   |   | RESULTS                                                                                                                                                                                                                                                                                                                                                                                                    |       |
|                                  |                                         |                                                          |                    |                                                                        |                                                                                                        |                                                                     |                                                                                                                            |                             |         |   |   |   |   |   |   |   | A significant time-effect was<br>observed for TNF $\alpha$ , IL-4,<br>phagocytic activity of<br>neutrophils and lytic activity<br>of NK cells independent of<br>the type of beverage<br>consumed.                                                                                                                                                                                                          |       |
| 6 M<br>Mean 31y                  | Randomized<br>crossover                 | Healthy,<br>nonsmokers                                   | Overnight fast     | 1 week, usual diet,<br>no polyphenol- or<br>anthocyanin- rich<br>foods | 2 white rolls<br>(150 g), 200 min<br>after<br>intervention,<br>subjects<br>consumed a<br>complete meal | Blood: 0, 0.33, 0.66, 1, 1.5, 2, 3,<br>6, 24 h<br>Urine: 0-3, 4-6 h | 1. RW 500 mL, 68 mg M-3-G<br>2. DRW 500 mL, 58 mg M-3-G<br>3. RGJ 500mL, 117 mg M-3-G<br>4. 12% ethanol dilution 500<br>ml | -                           | Glucose | - | - | - | - | - | - | - | Malvidin-3-glucoside (M-3-G),<br>Malvidin,<br>M-3-G glucuronates/sulfates<br>(searched in the urine of 2<br>subjects after RGJ)                                                                                                                                                                                                                                                                            | [119] |
|                                  |                                         |                                                          |                    |                                                                        |                                                                                                        |                                                                     |                                                                                                                            |                             |         |   |   |   |   |   |   |   | RESULTS                                                                                                                                                                                                                                                                                                                                                                                                    |       |
|                                  |                                         |                                                          |                    |                                                                        |                                                                                                        |                                                                     |                                                                                                                            |                             |         |   |   |   |   |   |   |   | (Sugar content of the<br>beverages were RW<br>1 g/L, DRW 1 g/L,<br>RGJ 206 g/L)<br>Serum glucose after<br>RGJ peaked at t = 20<br>min, whereas RW<br>and DRW at t = 60<br>min                                                                                                                                                                                                                              |       |
|                                  |                                         |                                                          |                    |                                                                        |                                                                                                        |                                                                     |                                                                                                                            |                             |         |   |   |   |   |   |   |   | The ingested amount of M-3-G<br>from each beverage shows<br>a linear relationship with the<br>AUC of plasma M-3-G<br>concentrations.<br>Plasma M-3-G and the<br>respective AUC after RGJ<br>was about 2-fold higher than<br>after RW ( $p < 0.01$ ) or DRW<br>( $p < 0.01$ )<br>Mean time of individual $C_{max}$<br>for plasma M-3-G after RGJ<br>consumption was delayed (t<br>= 120 min) as compared to |       |
|                                  |                                         |                                                          |                    |                                                                        |                                                                                                        |                                                                     |                                                                                                                            |                             |         |   |   |   |   |   |   |   | The urine samples showed the<br>highest concentrations of M-3-G<br>in the samples collected during<br>the first 3 h.<br><br>During the first 6 h, 16 $\mu$ g M-3-G<br>were excreted, which is less than<br>0.03 % of the ingested amount.<br><br>A linear relationship was found<br>for the total excretion of M-3-G<br>and the dose ingested (r = 0.386).                                                 |       |

|                             |                      |                                                 |                                                                                 |                                                                               |                                                                                      |                                                                 |                                                                                                                                                                                   |                                                 |   |   |   |                                                                                                                                                                                                                                                                                                                                                                                                                                                                                  |                                                                        |
|-----------------------------|----------------------|-------------------------------------------------|---------------------------------------------------------------------------------|-------------------------------------------------------------------------------|--------------------------------------------------------------------------------------|-----------------------------------------------------------------|-----------------------------------------------------------------------------------------------------------------------------------------------------------------------------------|-------------------------------------------------|---|---|---|----------------------------------------------------------------------------------------------------------------------------------------------------------------------------------------------------------------------------------------------------------------------------------------------------------------------------------------------------------------------------------------------------------------------------------------------------------------------------------|------------------------------------------------------------------------|
|                             |                      |                                                 |                                                                                 |                                                                               |                                                                                      |                                                                 |                                                                                                                                                                                   |                                                 |   |   |   | red wine (t = 50 min, p = 0.008) and dealcoholized red wine (t = 90, p = 0.10).                                                                                                                                                                                                                                                                                                                                                                                                  | 24 h after interventions, M-3-G was not detected in the urine samples. |
| 9:<br>5 M<br>4 W            | Randomized crossover | Healthy, nonsmokers                             | 14 h fast, 3 days no alcohol, fruit, vegetables, wine, tea, chocolate or coffee | 2 days                                                                        | The subjects were fed a low-flavonoid lunch after collection of the 3 h blood sample | Blood: 0, 0.5, 1, 2, 3, 4, 8 h                                  | 1. DRW 120 mL, ~35 mg free catechin<br>2. ARW 120 mL, ~35 mg free catechin                                                                                                        | -                                               | - | - | - | (+)-catechin:<br>8 h AUC<br>$f_{max}$<br>$c_{max}$<br>$t_{1/2}$<br>Differences in mean values of these variables were also studied between the two sexes.                                                                                                                                                                                                                                                                                                                        | [120]                                                                  |
| RESULTS                     |                      |                                                 |                                                                                 |                                                                               |                                                                                      |                                                                 |                                                                                                                                                                                   |                                                 |   |   |   |                                                                                                                                                                                                                                                                                                                                                                                                                                                                                  |                                                                        |
| 12 M<br>40-63y              | Randomized crossover | Healthy, nonsmokers, light-to-moderate drinkers | 12 h fast, 24 h no coffee or tea, 2 days no alcohol                             | 1 week, no grape products or any other high phenol-containing foods or drinks | 2 plain, low-fat bagels                                                              | Blood: 0, 1, 2, 4 h                                             | 9 subjects tested all 4 interventions.<br>3 subjects didn't test water.<br>1. RW 5 mL/kg body wt<br>2. PSRW 5 mL/kg body wt<br>3. DRW 5 mL/kg body wt<br>4. Water 5 mL/kg body wt | Ex vivo Cu <sup>2+</sup> -induced LDL oxidation | - | - | - | Caffeic acid<br>Protocatechuic acid<br>4-O-methylgallic acid<br>Uric acid<br>Ex vivo Cu <sup>2+</sup> -induced serum oxidation                                                                                                                                                                                                                                                                                                                                                   | [121]                                                                  |
| RESULTS                     |                      |                                                 |                                                                                 |                                                                               |                                                                                      |                                                                 |                                                                                                                                                                                   |                                                 |   |   |   |                                                                                                                                                                                                                                                                                                                                                                                                                                                                                  |                                                                        |
|                             |                      |                                                 |                                                                                 |                                                                               |                                                                                      |                                                                 |                                                                                                                                                                                   | NS                                              |   |   |   | RW, DRW vs. PSRW, water:<br>↑ Caffeic acid<br>↑ 4-O-methylgallic acid<br>RW, DRW, PSRW vs. water:<br>↑ Uric acid                                                                                                                                                                                                                                                                                                                                                                 |                                                                        |
| 12:<br>8 M<br>4 W<br><40y   | Randomized crossover | Healthy, nonsmokers                             | -                                                                               | <1 week                                                                       | Standardized light lunch                                                             | Blood: 0, 0.5, 1 h<br>Brachial artery measurements: 0, 0.5, 1 h | 1. RW 250 mL<br>2. DRW 250 mL                                                                                                                                                     | -                                               | - | - | - | Brachial artery:<br>Resting vessel diameter,<br>Resting blood flow<br>Brachial artery during flow-mediated dilatation examination:<br>Peak blood flow,<br>Blood flow increase,<br>Flow-mediated dilatation (FMD)<br>HR                                                                                                                                                                                                                                                           | [122]                                                                  |
| RESULTS                     |                      |                                                 |                                                                                 |                                                                               |                                                                                      |                                                                 |                                                                                                                                                                                   |                                                 |   |   |   |                                                                                                                                                                                                                                                                                                                                                                                                                                                                                  |                                                                        |
|                             |                      |                                                 |                                                                                 |                                                                               |                                                                                      |                                                                 |                                                                                                                                                                                   |                                                 |   |   |   | RW vs. BL, DRW:<br>↑ Vessel diameter<br>↑ Blood flow<br>RW vs. BL:<br>↑ HR<br>RW, DRW vs. BL:<br>↑ Peak blood flow<br>DRW vs. RW:<br>↑ Blood flow increase<br>DRW vs. BL, RW:<br>↑ FMD                                                                                                                                                                                                                                                                                           |                                                                        |
| 9:<br>5 M<br>4 W<br>29 ± 3y | Randomized crossover | -                                               | 14 h fast, 2 days no fruits, vegetables, chocolate, coffee or tea               | >2 days                                                                       | -                                                                                    | Blood: 0, 0.5, 1, 2, 3, 4, 8 h                                  | 1. RW 120 mL, ~34 mg free catechin<br>2. DRW 120 mL, ~35 mg free catechin                                                                                                         | -                                               | - | - | - | Total catechin, Methylated catechin metabolites, Unmethylated catechin metabolites, Sulfated catechin metabolites and their relative: half-lives of absorption ( $A_{1/2}$ ) half-lives of elimination ( $E_{1/2}$ ) areas under the curves (AUC) maximum concentrations ( $C_{max}$ ) maximum times ( $T_{max}$ )                                                                                                                                                               | [123]                                                                  |
| RESULTS                     |                      |                                                 |                                                                                 |                                                                               |                                                                                      |                                                                 |                                                                                                                                                                                   |                                                 |   |   |   |                                                                                                                                                                                                                                                                                                                                                                                                                                                                                  |                                                                        |
|                             |                      |                                                 |                                                                                 |                                                                               |                                                                                      |                                                                 |                                                                                                                                                                                   |                                                 |   |   |   | At BL, total catechin was <2 nmol/L.<br>At 1 h, maximum levels of total catechin varied from 50 to 176 nmol/L (RW) and from 46 to 139 nmol/L (DRW) among individuals.<br>At 1 h, methylated metabolites accounted for 20 ± 2% (RW) and 22 ± 3% (DRW) of total catechin.<br>At 1 h, free catechin and free <sup>3</sup> MC accounted for <2% of total catechin metabolites.<br>At 3-4 h, no free catechin was detected in plasma.<br>At 4 h, methylated metabolites accounted for |                                                                        |

---

only 14 ± 2% (RW) and 12 ± 1% (DRW) of total catechin. At 8 h, levels of total catechin were <25% of the maximum levels.  
3'MC was not present in a form containing only a sulfate conjugate.  
DRW vs. RW:  
↑  $E_{1/2}$  of total catechin (3, 4, 8 h)  
↑  $E_{1/2}$  of unmethylated catechin metabolites (3, 4, 8 h)

---

M = men, W = women; y = years; BL = baseline; SBP = systolic blood pressure; DBP = diastolic blood pressure; BP = blood pressure; HR = heart rate; W = wine; RW = red wine; DW = dealcoholized wine; DRW = dealcoholized red wine; OxLDL = oxidized low density lipoproteins; TG = triglycerides; HDL = high density lipoproteins; CRP = c-reactive protein; OHTyr = hydroxytyrosol; HVAL = homovanillyl alcohol; DOPAC = 3,4-dihydroxyphenylacetic acid; HVA = homovanillic acid; 4HPAA = 4-hydroxyphenylacetic acid; 20-HETE = 20-hydroxy eicosatrienoic acid; EETs = epoxyeicosatrienoic acids; DHETs = dihydroxyeicosatetraenoic acid metabolites; ET-1 = endothelin-1; FO = fat overload; LPS = lipopolysaccharide;  $\Delta$ TG = difference between postprandial and baseline triglycerides' values; TC = total cholesterol; LDL = low density lipoproteins; ApoA-I = apolipoprotein A1; ApoB = apolipoprotein B; HOMA-IR = homeostatic model assessment for insulin resistance; LBP = lipopolysaccharide binding protein; GGT = gamma-glutamyl transferase; GPT = glutamic pyruvic transaminase; TEAC = trolox equivalent antioxidant capacity; NF- $\kappa$ B = nuclear factor kappa-light-chain-enhancer of activated B cells; NS = non significant; tPAI-1 = tissue plasminogen activator inhibitor-1; sE-selectin = soluble E-selectin; sVCAM-1 = soluble vascular cell adhesion molecule 1; sICAM-1 = soluble intercellular adhesion molecule 1; MMP-9 = matrix metalloproteinase 9; MPO = myeloperoxidase; hsCRP = high-sensitivity C-reactive protein; CFR = coronary flow velocity reserve; Rate pressure product = systolic blood pressure x heart rate; FRAP = ferric reducing antioxidant power; min = minutes; h = hour; PSRW = polyphenols-stripped red wine; ET = ethanol-water solution; FMD = flow mediated dilatation; TPP = total phenolic content in plasma;  $TM_0$  = Tail Moment in untreated cells (endogenous DNA strand breaks);  $TM_{300}$  = Tail Moment in cells treated with 300  $\mu$ M  $H_2O_2$  for 20 min (exogenous DNA strand breaks); 1Cig = 1 cigarette;  $TNF\alpha$  = tumor necrosis factor alpha; IL = interleukin; NK cell = natural killer cell; RGJ = red grape juice; GGT =  $\gamma$ -glutamyl-transferase; ARW = alcoholized red wine; 8 h AUC = area under curve at 8 h (of plasma concentration);  $t_{max}$  = time to maximum plasma concentration;  $c_{max}$  = maximum plasma concentration;  $t_{1/2}$  = elimination half-life.
